# Supplementary material
Source: PubMed Central journal article supplement (PMC2654223)
Supplement: NIHMS86470-supplement-1_si_001.pdf [file NIHMS86470-supplement-1_si_001.pdf]

# Resonance Raman Interrogation of the Consequences of Heme Rotational Disorder in Myoglobin and its Ligated Derivatives

*Freeborn Rwere, Piotr J. Mak and James R. Kincaid\**

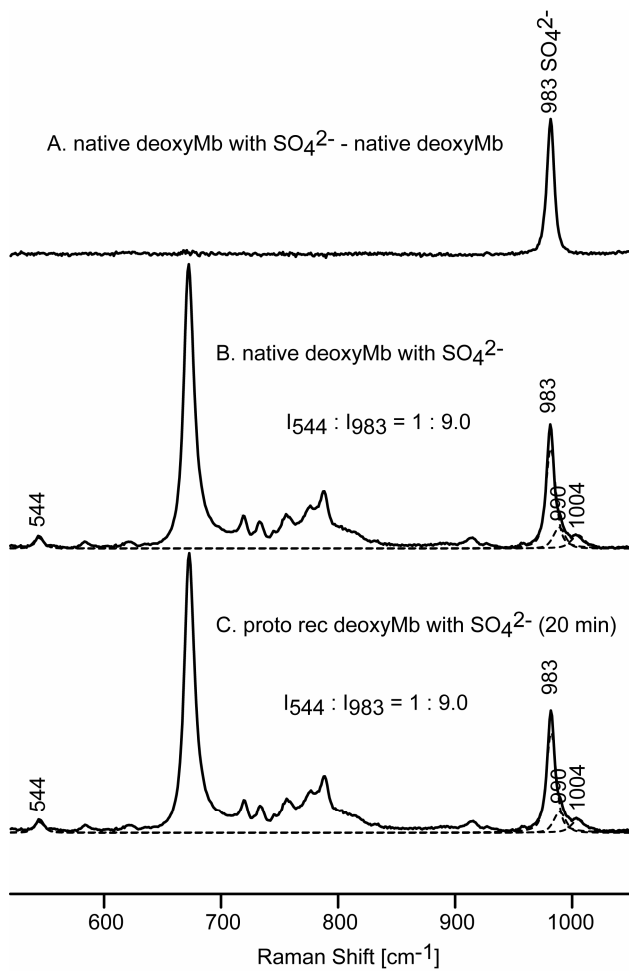

**Figure S1.** The difference spectrum of native deoxyMb with sulfate and native deoxyMb without sulfate, (A); the RR spectra of native deoxyMb with sulfate, (B); and 20 minute reconstituted deoxyMb with sulfate, (C).

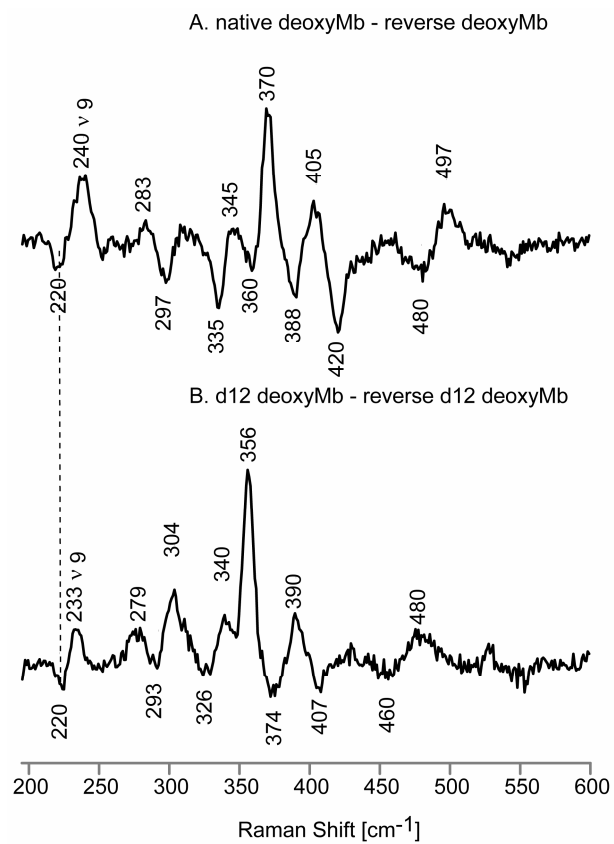

**Figure S2.** The difference spectra of native and reversed form for proto reconstituted deoxyMb, (A); and equilibrated and reversed d12 deoxyMb, (B).

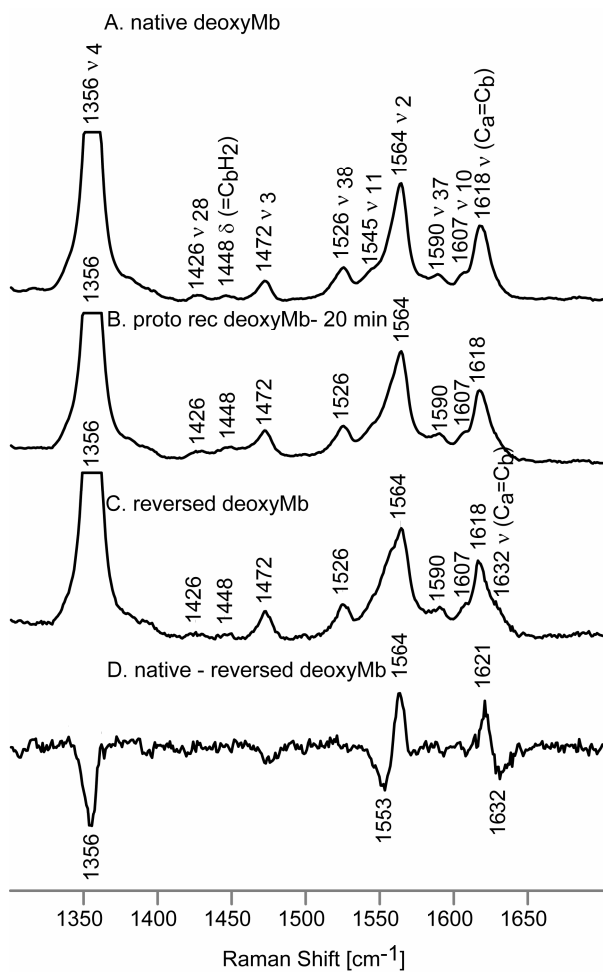

**Figure S3.** High frequency RR spectra for native deoxyMb, (A); 20 minute reconstituted deoxyMb, (B); reversed deoxyMb, (C); and difference of native minus reversed deoxyMb, (D).

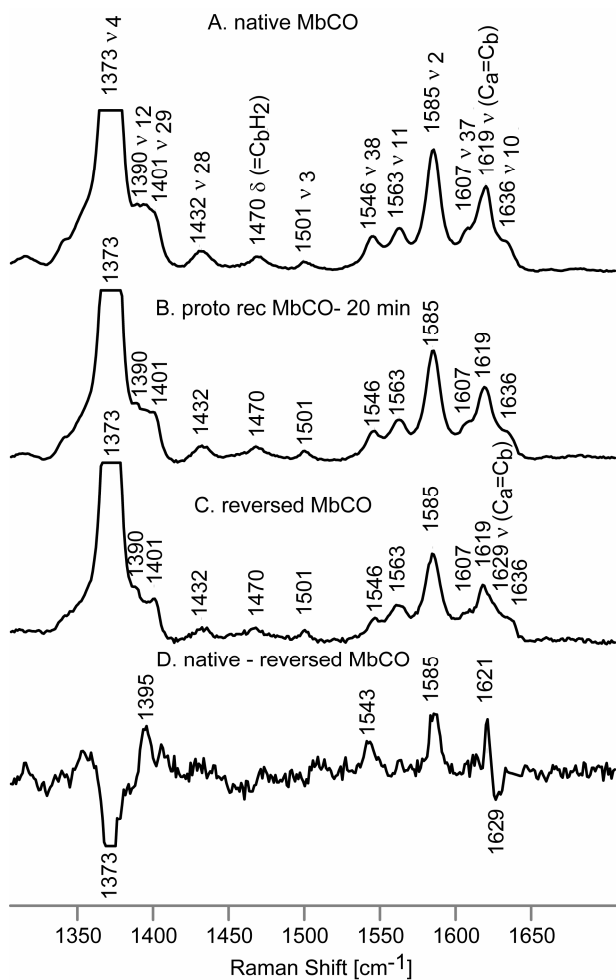

**Figure S4.** High frequency RR spectra for native MbCO, (A); 20 minute reconstituted MbCO, (B); reversed MbCO, (C); and difference of native minus reversed MbCO, (D).

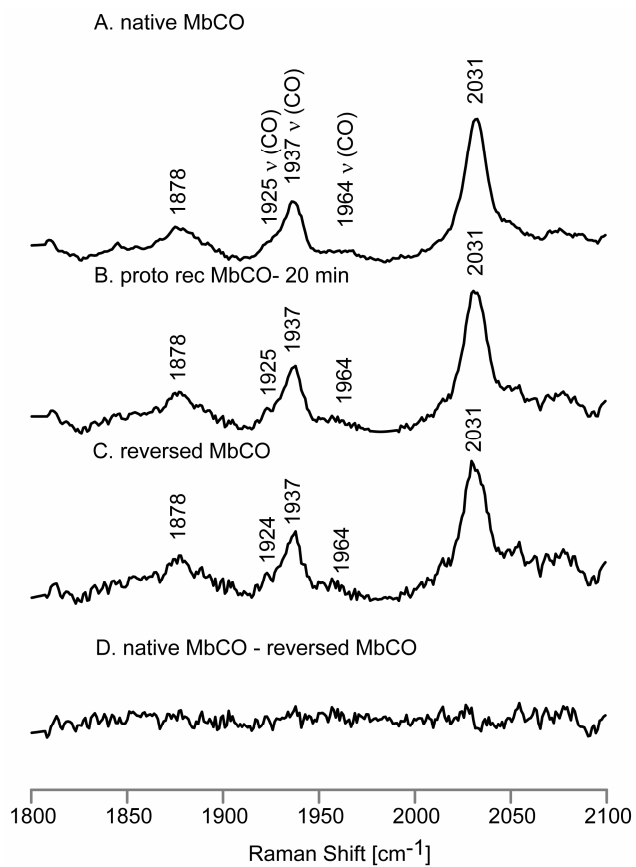

**Figure S5.** High frequency RR spectra in the region 1800-2100 cm<sup>-1</sup> of native MbCO, (A); 20 minute reconstituted MbCO, (B); reversed MbCO, (C); and native minus reversed MbCO, (D). The bands appearing at 1964 cm<sup>-1</sup>, 1937 cm<sup>-1</sup> and 1925 cm<sup>-1</sup> in both native and the reversed form for HHMb correspond to the CO stretching frequencies of conformational substates A<sub>0</sub>, A<sub>1</sub>, and A<sub>3</sub> of myoglobin.
